# Supplementary material
Source: publisher figshare collection journal article supplement (https://tandf.figshare.com/ndownloader/files/2378199)
Supplement: Supplementary file 1 [file 2378199]

---

## Attitudes and perceptions of veterinary paraprofessionals in New Zealand to postoperative pain in dogs and cats

**K Kongara\*<sup>§</sup>, HE Squance\*, IA Topham\* and JP Bridges\***

\*Institute of Veterinary, Animal and Biomedical Sciences, Massey University, Private Bag11-222, Palmerston North 4442, New Zealand.

<sup>§</sup> Author for correspondence: Email: k.kongara@massey.ac.nz

---

**Supplementary Table 1: Questionnaire used to survey the attitudes and perceptions of veterinary paraprofessionals in New Zealand to postoperative pain in dogs and cats.**

---

## Demographics

### \*1. Which category below includes your age?

- ☐ 17 or younger
- ☐ 18-20
- ☐ 21-29
- ☐ 30-39
- ☐ 40-49
- ☐ 50-59
- ☐ 60+
- ☐ 60 or older

### \*2. What gender are you?

- ☐ Male
- ☐ Female

### 3. Which of the following categories best describes your veterinary nursing qualification(s)

- ☐ No formal qualification
- ☐ Certificate in Animal Care or equivalent
- ☐ Certificate in Rural Animal Technician or equivalent
- ☐ Certificate in Veterinary Nursing or equivalent
- ☐ Diploma in Veterinary Nursing or equivalent
- ☐ Bachelor of Veterinary Technology or equivalent
- ☐ Student Veterinary Nurse/Technologist

Other (please specify)

### \*4. If qualified, how many years have you been qualified?

- ☐ 1 - 11months
- ☐ 1 - 2 years
- ☐ 2 - 5 years
- ☐ 5 - 7 years
- ☐ 7 - 10 years
- ☐ 10 - 15 years

15 - 20 years

☐ 20 + years

**5. What type of practice do you work in?**

|                        | Small Animal          | Equine                | Production Animal     | Mixed                 |
|------------------------|-----------------------|-----------------------|-----------------------|-----------------------|
| General Practice       | <input type="radio"/> | <input type="radio"/> | <input type="radio"/> | <input type="radio"/> |
| Specialty Practice     | <input type="radio"/> | <input type="radio"/> | <input type="radio"/> | <input type="radio"/> |
| Other (please specify) | <input type="text"/>  |                       |                       |                       |

**\*6. Pain score the following procedures in the first 12 hours after surgery****1 = no pain 10 = worst pain imaginable**

|                                       | 1                     | 2                     | 3                     | 4                     | 5                     | 6                     | 7                     | 8                     | 9                     | 10                    |
|---------------------------------------|-----------------------|-----------------------|-----------------------|-----------------------|-----------------------|-----------------------|-----------------------|-----------------------|-----------------------|-----------------------|
| Fracture repair in a dog              | <input type="radio"/> |
| Bitch spay                            | <input type="radio"/> |
| Dog castrate                          | <input type="radio"/> |
| Cruciate repair in a dog              | <input type="radio"/> |
| Cat spay                              | <input type="radio"/> |
| Cat castrate                          | <input type="radio"/> |
| Cat dental                            | <input type="radio"/> |
| Repair of ruptured diaphragm in a cat | <input type="radio"/> |
| Caesarian section                     | <input type="radio"/> |

**7. Do you agree/disagree with the following statements?**

|                                                                                 | Agree                 | Disagree              |
|---------------------------------------------------------------------------------|-----------------------|-----------------------|
| A degree of pain is required to stop the animal being too active after surgery  | <input type="radio"/> | <input type="radio"/> |
| Animals benefit from perioperative analgesic therapy                            | <input type="radio"/> | <input type="radio"/> |
| Animals benefit from postoperative analgesic therapy                            | <input type="radio"/> | <input type="radio"/> |
| Surgery does not usually result in sufficient pain to warrant analgesic therapy | <input type="radio"/> | <input type="radio"/> |
| Animal recover better from anaesthesia if given analgesic therapy               | <input type="radio"/> | <input type="radio"/> |
|                                                                                 | <input type="radio"/> | <input type="radio"/> |

A pain scale to  
assess a patient  
would be/is a  
useful clinical tool

Pain could be  
better assessed in  
animals

Agree

Disagree

Please comment on any of the statements if you wish to explain and/or comment on your answer

**8. Who is predominantly responsible for monitoring animal pain postoperatively in your practice?**

- ☐ Veterinarian
- ☐ Veterinary Nurse

Comment

**9. Do you feel your knowledge of pain and assessment of pain could be enhanced?**

- ☐ Agree
- ☐ Disagree

Comment

**10. Where have you gained most of your knowledge about pain?**

|                         | Extremely<br>useful   | Useful                | Somewhat<br>useful    | Occasionally<br>useful | No use                |
|-------------------------|-----------------------|-----------------------|-----------------------|------------------------|-----------------------|
| Formal education        | <input type="radio"/> | <input type="radio"/> | <input type="radio"/> | <input type="radio"/>  | <input type="radio"/> |
| Colleagues              | <input type="radio"/> | <input type="radio"/> | <input type="radio"/> | <input type="radio"/>  | <input type="radio"/> |
| Journals &<br>textbooks | <input type="radio"/> | <input type="radio"/> | <input type="radio"/> | <input type="radio"/>  | <input type="radio"/> |
| Seminars /<br>workshops | <input type="radio"/> | <input type="radio"/> | <input type="radio"/> | <input type="radio"/>  | <input type="radio"/> |
| Conferences             | <input type="radio"/> | <input type="radio"/> | <input type="radio"/> | <input type="radio"/>  | <input type="radio"/> |
| Clinical experience     | <input type="radio"/> | <input type="radio"/> | <input type="radio"/> | <input type="radio"/>  | <input type="radio"/> |
| Other                   | <input type="radio"/> | <input type="radio"/> | <input type="radio"/> | <input type="radio"/>  | <input type="radio"/> |

Other (please specify)

**\*11. Do you use a formal pain scoring system in your practice?**

- ☐ Yes
- ☐ No
- ☐ If yes, what type of pain scoring system do you use? If no, what is your preferred method of pain assessment?
